# Supplementary material for: Anodal tDCS Over the Left Prefrontal Cortex Does Not Cause Clinically Significant Changes in Circulating Metabolites
Source: PubMed Central journal article supplement (PMC7221177; doi:10.3389/fpsyt.2020.00403), 2020-05-07
Supplement: Image_1.pdf [file Image_1.pdf]

**Supplementary Figure 2:** Pareto chart from principal components analyses of the metabolite data.

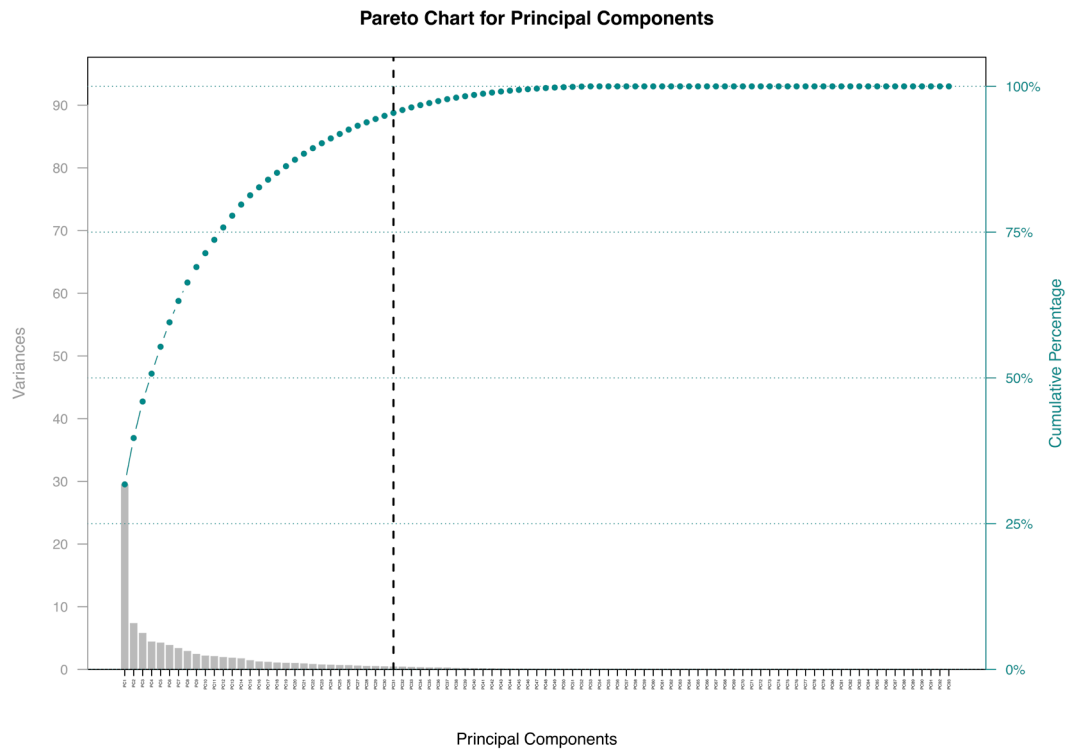

**Note:** the dashed vertical line indicates the number of principal components explaining  $\geq 95\%$  of the variance within the metabolite data analysed.
